# Supplementary material for: Exploring CDF gene family in wild potato under salinity stress unveils promising candidates for developing climate-resilient crops
Source: Springer Nature journal article supplement (doi:10.1038/s41598-024-75412-2), 2024-10-19
Supplement: MOESM1 [file 41598_2024_75412_MOESM1_ESM.xlsx]

## Sheet: Kwenda et al., 2016
		BC	B6	B12	B24	B72	VC	V6	V12	V24	V72	B-01	V-01	BC	B6	B12	B24	B72	VC	V6	V12	V24	V72	B-01	V-01
		avg SRR2932299 SRR2932300 SRR2932301	avg SRR2932302 SRR2932303 SRR2932304	avg SRR2932305 SRR2932306 SRR2932307	avg SRR2932308 SRR2932309 SRR2932310	avg SRR2932311 SRR2932312 SRR2932313	avg SRR2932314 SRR2932315 SRR2932316	avg SRR2932317 SRR2932318 SRR2932319	avg SRR2932320 SRR2932321 SRR2932322	avg SRR2932323 SRR2932324 SRR2932325	avg SRR2932326 SRR2932327 SRR2932328	SRR2932329	SRR2932330	avg SRR2932299 SRR2932300 SRR2932301	avg SRR2932302 SRR2932303 SRR2932304	avg SRR2932305 SRR2932306 SRR2932307	avg SRR2932308 SRR2932309 SRR2932310	avg SRR2932311 SRR2932312 SRR2932313	avg SRR2932314 SRR2932315 SRR2932316	avg SRR2932317 SRR2932318 SRR2932319	avg SRR2932320 SRR2932321 SRR2932322	avg SRR2932323 SRR2932324 SRR2932325	avg SRR2932326 SRR2932327 SRR2932328	SRR2932329	SRR2932330
		Counts Per Million (CPM)												log2 CPM
DOF name	Gene ID
StDOF11	PGSC0003DMG400001330	890	1085	1810	589	1675	465	318	1286	515	2699	465	549	3.71281	3.95474	4.64404	3.28187	4.52311	2.68892	2.15638	4.40449	2.90526	5.2303	4.3797	4.66607
StDOF19	PGSC0003DMG400018408	1084	898	834	879	1811	3393	1472	2343	2709	4732	541	698	3.9973	3.68184	3.52617	3.85946	4.63573	5.55618	4.36706	5.26996	5.30038	6.04032	4.59809	5.01249
StDof15	PGSC0003DMG400019528	1879	2565	2740	8321	10347	4633	2964	6628	12139	14476	2358	2066	4.7909	5.19601	5.24223	7.10228	7.15009	6.00556	5.37683	6.77017	7.46419	7.65346	6.72196	6.57803
StDOF4	PGSC0003DMG400025129	624	1092	1284	720	1090	1039	759	1544	1134	1333	397	429	3.20055	3.96402	4.1487	3.57159	3.90327	3.84881	3.41145	4.66827	4.04404	4.21255	4.1516	4.31024
StDof23	PGSC0003DMG400033046	850	1052	2048	3993	6862	2324	1186	6216	8630	6237	1689	1113	3.64647	3.91018	4.82227	6.043	6.55757	5.01022	4.05539	6.67759	6.97198	6.43872	6.24056	5.68564
StDof5	PGSC0003DMG400037029	449	402	317	363	392	785	562	507	699	674	181	184	2.72572	2.52232	2.1306	2.58357	2.42787	3.44438	2.97792	3.06166	3.34598	3.22869	3.01845	3.08897
avg = avarge of three biological replicates
BC = cv. BP1 (tolerant) 0 h post inoculation with P. carotovorum subsp. brasiliense 1692
B6 = cv. BP1 (tolerant) 6 h post inoculation with P. carotovorum subsp. brasiliense 1692
B12 = cv. BP1 (tolerant) 12 h post inoculation with P. carotovorum subsp. brasiliense 1692
B24 = cv. BP1 (tolerant) 24 h post inoculation with P. carotovorum subsp. brasiliense 1692
B72 = cv. BP1 (tolerant) 72 h post inoculation with P. carotovorum subsp. brasiliense 1692
VC = cv. Valor (susceptible) 0 h post inoculation with P. carotovorum subsp. brasiliense 1692
V6 = cv. Valor (susceptible) 6 h post inoculation with P. carotovorum subsp. brasiliense 1692
V12 = cv. Valor (susceptible) 12 h post inoculation with P. carotovorum subsp. brasiliense 1692
V24 = cv. Valor (susceptible) 24 h post inoculation with P. carotovorum subsp. brasiliense 1692
V72 = cv. Valor (susceptible) 72 h post inoculation with P. carotovorum subsp. brasiliense 1692
B-01 = cv. BP1 (tolerant) control
V-01 = cv. Valor (susceptible) control

## Sheet: Li et al., 2020
		CK_0h	CK_24h	CK_48h	CK_72h	CK_96h	HS_24h	HS_48h	HS_72h	HS_96h	CK_0h	CK_24h	CK_48h	CK_72h	CK_96h	HS_24h	HS_48h	HS_72h	HS_96h
		avg SRR10723850 SRR10723849 SRR10723838	avg SRR10723830 SRR10723829 SRR10723828	avg SRR10723827 SRR10723826 SRR10723825	avg SRR10723824 SRR10723848 SRR10723847	avg SRR10723846 SRR10723845 SRR10723844	avg SRR10723843 SRR10723842 SRR10723841	avg SRR10723840 SRR10723839 SRR10723837	avg SRR10723836 SRR10723835 SRR10723834	avg SRR10723833 SRR10723832 SRR10723831	avg SRR10723850 SRR10723849 SRR10723838	avg SRR10723830 SRR10723829 SRR10723828	avg SRR10723827 SRR10723826 SRR10723825	avg SRR10723824 SRR10723848 SRR10723847	avg SRR10723846 SRR10723845 SRR10723844	avg SRR10723843 SRR10723842 SRR10723841	avg SRR10723840 SRR10723839 SRR10723837	avg SRR10723836 SRR10723835 SRR10723834	avg SRR10723833 SRR10723832 SRR10723831
DOF name	Gene ID	Counts Per Million (CPM)									log2 CPM
StDOF11	PGSC0003DMG400001330	219	1308	780	485	517	2841	1843	4363	7375	0.989221	3.53175	2.62914	2.01521	2.32603	4.83259	3.98525	5.03814	6.01569
StDOF19	PGSC0003DMG400018408	1390	1712	3136	2502	5322	2159	1330	3042	5097	3.6553	3.92007	4.63652	4.38224	5.68977	4.43655	3.51462	4.51784	5.4827
StDof15	PGSC0003DMG400019528	10037	6298	15109	16938	29682	4570	2803	6199	9670	6.50747	5.79928	6.90493	7.14135	8.16931	5.51838	4.59017	5.54485	6.40657
StDOF4	PGSC0003DMG400025129	1670	1565	1944	1769	1684	2621	2562	7171	16986	3.92007	3.79055	3.94663	3.88209	4.02969	4.7163	4.46047	5.75499	7.21932
StDof23	PGSC0003DMG400033046	6335	2336	5689	6734	23974	2487	2701	7497	11912	5.84356	4.36843	5.49577	5.81062	7.8612	4.64059	4.53669	5.81913	6.70739
StDof5	PGSC0003DMG400037029	363	511	461	444	116	389	161	163	135	1.71826	2.17578	1.87044	1.88779	0.169994	1.96403	0.468329	0.295759	0.244082
avg = avarge of three biological replicates
CK_0h = Potato tissue cultured seedling grown in MS medium without NaCl with 4 weeks age
CK_24h = Potato tissue cultured seedling with 4 weeks age grown in MS medium without NaCl for 24h
CK_48h = Potato tissue cultured seedling with 4 weeks age grown in MS medium without NaCl for 48h
CK_72h = Potato tissue cultured seedling with 4 weeks age grown in MS medium without NaCl for 72h
CK_96h = Potato tissue cultured seedling with 4 weeks age grown in MS medium without NaCl for 96h
HS_24h = Potato tissue cultured seedling with 4 weeks age grown in MS medium with 500 mmol/L NaCl for 24h
HS_48h = Potato tissue cultured seedling with 4 weeks age grown in MS medium with 500 mmol/L NaCl for 48h
HS_72h = Potato tissue cultured seedling with 4 weeks age grown in MS medium with 500 mmol/L NaCl for 72h
HS_96h = Potato tissue cultured seedling with 4 weeks age grown in MS medium with 500 mmol/L NaCl for 96h

## Sheet: Tiwari et al., 2020
		Lshoot	Hshoot	Lroot	Hroot	Lstolon	Hstolon	Lshoot	Hshoot	Lroot	Hroot	Lstolon	Hstolon
		SRR8846453	SRR8846454	SRR8846455	SRR8846456	SRR8846457	SRR8846458	SRR8846453	SRR8846454	SRR8846455	SRR8846456	SRR8846457	SRR8846458
DOF name	Gene ID	Counts Per Million (CPM)						log2 CPM
StDOF11	PGSC0003DMG400001330	37	25	768	1080	1009	1026	0.215834	-0.811886	4.23167	4.80919	4.64787	4.6883
StDOF19	PGSC0003DMG400018408	91	93	146	184	1169	1685	1.51418	1.08342	1.83653	2.25593	4.86022	5.40401
StDof15	PGSC0003DMG400019528	3339	4796	2585	2726	4932	7700	6.71158	6.77187	5.98265	6.14494	6.93712	7.59612
StDOF4	PGSC0003DMG400025129	290	266	606	666	1391	1272	3.18629	2.59954	3.88988	4.11175	5.11107	4.99836
StDof23	PGSC0003DMG400033046	3231	4885	2396	1999	8270	9927	6.66415	6.7984	5.87311	5.69743	7.68283	7.96262
StDof5	PGSC0003DMG400037029	38	51	594	749	220	142	0.254308	0.216683	3.86102	4.28119	2.45052	1.83523
avg = avarge of three biological replicates
L = 0.2 mM N; H 4 mM N (control)

## Sheet: Alvarez-Morezuelas et al., 2022
		AgriaC	AgriaS	ZorbaC	ZorbaS	AgriaC	AgriaS	ZorbaC	ZorbaS
		avg SRR22159765 SRR22159766 SRR22159767 SRR22159778 SRR22159779	avg SRR22159760 SRR22159761 SRR22159762 SRR22159763 SRR22159764	avg SRR22159773 SRR22159774 SRR22159775 SRR22159776 SRR22159777	avg SRR22159768 SRR22159769 SRR22159770 SRR22159771 SRR22159772	avg SRR22159765 SRR22159766 SRR22159767 SRR22159778 SRR22159779	avg SRR22159760 SRR22159761 SRR22159762 SRR22159763 SRR22159764	avg SRR22159773 SRR22159774 SRR22159775 SRR22159776 SRR22159777	avg SRR22159768 SRR22159769 SRR22159770 SRR22159771 SRR22159772
DOF name	Gene ID	Counts Per Million (CPM)				log2 CPM
StDOF11	PGSC0003DMG400001330	28	105	14	124	-2.34757	-0.376113	-3.32908	-0.12166
StDOF19	PGSC0003DMG400018408	1344	3898	766	2029	3.23739	4.83816	2.44477	3.9107
StDof15	PGSC0003DMG400019528	37333	60223	33549	49306	8.03324	8.78767	7.89755	8.51362
StDOF4	PGSC0003DMG400025129	2569	3740	2599	4147	4.17206	4.77846	4.20731	4.942
StDof23	PGSC0003DMG400033046	40257	53479	37729	52025	8.14202	8.61633	8.06696	8.59106
StDof5	PGSC0003DMG400037029	11	10	17	31	-3.6955	-3.76843	-3.04897	-2.12166
avg = avarge of five biological replicates
AgriaC = potato cv. Agria control
Agria S = potato cv. Agria water-stressed
Zorba C = potato cv. Zorba control
Zorba S = potato cv. Zorba water-stressed

## Sheet: Guo et al., 2022
		Q9N0root	Q9N1root	Q9N0stem	Q9N1stem	Q9N0leaf	Q9N1leaf	65N0root	65N1root	65N0stem	65N1stem	65N0leaf	65N1leaf	Q9N0root	Q9N1root	Q9N0stem	Q9N1stem	Q9N0leaf	Q9N1leaf	65N0root	65N1root	65N0stem	65N1stem	65N0leaf	65N1leaf
		avg SRR14902849 SRR14902848 SRR14902837	avg SRR14902814 SRR14902847 SRR14902846	avg SRR14902826 SRR14902819 SRR14902818	avg SRR14902845 SRR14902844 SRR14902843	SRR14902816	avg SRR14902842 SRR14902841 SRR14902840	avg SRR14902839 SRR14902838 SRR14902836	avg SRR14902829 SRR14902828 SRR14902827	avg SRR14902835 SRR14902834 SRR14902833	avg SRR14902825 SRR14902824 SRR14902823	avg SRR14902832 SRR14902831 SRR14902830	avg SRR14902822 SRR14902821 SRR14902820	avg SRR14902849 SRR14902848 SRR14902837	avg SRR14902814 SRR14902847 SRR14902846	avg SRR14902826 SRR14902819 SRR14902818	avg SRR14902845 SRR14902844 SRR14902843	SRR14902816	avg SRR14902842 SRR14902841 SRR14902840	avg SRR14902839 SRR14902838 SRR14902836	avg SRR14902829 SRR14902828 SRR14902827	avg SRR14902835 SRR14902834 SRR14902833	avg SRR14902825 SRR14902824 SRR14902823	avg SRR14902832 SRR14902831 SRR14902830	avg SRR14902822 SRR14902821 SRR14902820
DOF name	Gene ID	Counts Per Million (CPM)												log2 CPM
StDOF11	PGSC0003DMG400001330	584	1937	155	379	18	48	498	376	77	113	25	27	3.07544	4.82732	1.40439	2.45611	-0.240802	-0.439375	2.93809	2.41068	0.246494	0.830988	-1.44066	-1.2169
StDOF19	PGSC0003DMG400018408	513	1378	578	549	161	1626	949	319	604	382	1511	732	2.88843	4.33607	3.30319	2.99071	2.92019	4.64277	3.86835	2.1735	3.21811	2.58824	4.47677	3.54392
StDof15	PGSC0003DMG400019528	1352	2503	2235	2611	1838	2228	3803	945	1739	2718	2074	2957	4.2865	5.19715	5.25433	5.24044	6.43319	5.0972	5.87101	3.74026	4.74375	5.41914	4.93368	5.55814
StDOF4	PGSC0003DMG400025129	3212	5470	1333	2009	582	1732	2552	2294	1366	1115	1220	1100	5.53487	6.32504	4.50873	4.86231	4.77415	4.73389	5.2955	5.01974	4.39545	4.13364	4.16815	4.13151
StDof23	PGSC0003DMG400033046	724	3013	3275	2241	1778	1851	2539	658	1902	3004	2359	2889	3.38546	5.4647	5.80555	5.01998	6.38531	4.82975	5.28813	3.21803	4.87301	5.56348	5.11944	5.52457
StDof5	PGSC0003DMG400037029	267	280	205	73	53	17	348	146	69	129	46	59	1.94631	2.037	1.80775	0.0798766	1.31719	-1.93687	2.42103	1.04591	0.0882316	1.02204	-0.560956	-0.0891398
avg = avarge of three biological replicates
Roots, shoots, and leaves of Q9 and 65 plants. N0 (N deficiency) and the N1 (N sufficiency)

## Sheet: Jian et al., 2022
		D1	D3	D6	D12	D24	D48	DC	D1	D3	D6	D12	D24	D48	DC
		avg SRR18272801 SRR18272802 SRR18272803	avg SRR18272798 SRR18272799 SRR18272800	avg SRR18272814 SRR18272815 SRR18272797	avg SRR18272811 SRR18272812 SRR18272813	avg SRR18272808 SRR18272809 SRR18272810	avg SRR18272804 SRR18272806 SRR18272807	avg SRR18272805 SRR18272816 SRR18272817	avg SRR18272801 SRR18272802 SRR18272803	avg SRR18272798 SRR18272799 SRR18272800	avg SRR18272814 SRR18272815 SRR18272797	avg SRR18272811 SRR18272812 SRR18272813	avg SRR18272808 SRR18272809 SRR18272810	avg SRR18272804 SRR18272806 SRR18272807	avg SRR18272805 SRR18272816 SRR18272817
DOF name	Gene ID	Counts Per Million (CPM)							log2 CPM
StDOF11	PGSC0003DMG400001330	1474	285	73	376	5714	5547	2198	4.52296	2.17716	0.187045	2.60575	6.42477	6.45457	5.07637
StDOF19	PGSC0003DMG400018408	10309	4006	1341	4527	24690	22105	10739	7.32906	5.99029	4.38631	6.1955	8.53613	8.44916	7.36496
StDof15	PGSC0003DMG400019528	26614	24258	25354	13208	12889	14249	11845	8.69734	8.58851	8.62715	7.74028	7.59834	7.81565	7.50638
StDOF4	PGSC0003DMG400025129	2693	1034	1195	1239	4911	4620	5630	5.39244	4.03636	4.22002	4.32612	6.20629	6.19075	6.43331
StDof23	PGSC0003DMG400033046	8873	13488	12282	2149	7741	6379	6697	7.11265	7.74173	7.58148	5.12061	6.86279	6.65619	6.68369
StDof5	PGSC0003DMG400037029	76	48	121	257	171	213	55	0.245369	-0.392696	0.916084	2.05678	1.36234	1.75178	-0.244251
avg = avarge of three biological replicates
D1 = cv Desireé 1 hour after drought stress
D3 = cv Desireé 3 hours after drought stress
D6 = cv Desireé 6 hours after drought stress
D12 = cv Desireé 12 hours after drought stress
D24 = cv Desireé 24 hours after drought stress
D48 = cv Desireé 48 hours after drought stress
DC = cv Desireé control

## Sheet: Ponce et al., 2022
		SLC	SL1	SL2	SL3	SR1	SR2	SR3	SRC	TL1	TL2	TL3	TLC	TR1	TR2	TR3	TRC	SLC	SL1	SL2	SL3	SR1	SR2	SR3	SRC	TL1	TL2	TL3	TLC	TR1	TR2	TR3	TRC
		avg SRR21209930 SRR21209932 SRR21209914	avg SRR21209940 SRR21209923 SRR21209905	avg SRR21209936 SRR21209918 SRR21209901	avg SRR21209898 SRR21209927 SRR21209910	avg SRR21209939 SRR21209922 SRR21209904	avg SRR21209935 SRR21209917 SRR21209900	avg SRR21209897 SRR21209926 SRR21209909	avg SRR21209919 SRR21209931 SRR21209913	avg SRR21209896 SRR21209925 SRR21209907	avg SRR21209938 SRR21209921 SRR21209902	avg SRR21209908 SRR21209929 SRR21209912	avg SRR21209942 SRR21209934 SRR21209916	avg SRR21209895 SRR21209924 SRR21209906	avg SRR21209937 SRR21209920 SRR21209903	avg SRR21209899 SRR21209928 SRR21209911	avg SRR21209941 SRR21209933 SRR21209915	avg SRR21209930 SRR21209932 SRR21209914	avg SRR21209940 SRR21209923 SRR21209905	avg SRR21209936 SRR21209918 SRR21209901	avg SRR21209898 SRR21209927 SRR21209910	avg SRR21209939 SRR21209922 SRR21209904	avg SRR21209935 SRR21209917 SRR21209900	avg SRR21209897 SRR21209926 SRR21209909	avg SRR21209919 SRR21209931 SRR21209913	avg SRR21209896 SRR21209925 SRR21209907	avg SRR21209938 SRR21209921 SRR21209902	avg SRR21209908 SRR21209929 SRR21209912	avg SRR21209942 SRR21209934 SRR21209916	avg SRR21209895 SRR21209924 SRR21209906	avg SRR21209937 SRR21209920 SRR21209903	avg SRR21209899 SRR21209928 SRR21209911	avg SRR21209941 SRR21209933 SRR21209915
DOF name	Gene ID	Counts Per Million (CPM)																Counts Per Million (CPM)
StDOF11	PGSC0003DMG400001330	34	38	156	132	869	1367	1494	949	22	421	148	27	751	892	1054	650	-1.53021	-1.48546	0.411245	0.42553	3.00013	3.83118	3.60198	3.15373	-2.37669	1.99064	0.394583	-1.84042	3.09299	2.89264	3.35629	2.78962
StDOF19	PGSC0003DMG400018408	457	348	669	525	261	298	167	532	611	514	993	345	174	436	134	210	2.21838	1.70956	2.51171	2.41731	1.26482	1.63355	0.440722	2.31875	2.41891	2.27859	3.14078	1.83514	0.983265	1.85992	0.380719	1.15957
StDof15	PGSC0003DMG400019528	11721	10779	12042	5968	10174	6449	742	4434	15664	7787	9816	9380	7973	9774	853	3426	6.89913	6.66255	6.68163	5.92417	6.54951	6.06924	2.59229	5.37786	7.09905	6.19981	6.44605	6.60006	6.50123	6.34647	3.05103	5.18763
StDOF4	PGSC0003DMG400025129	847	819	1302	884	1274	1185	1664	1347	1194	1133	1416	863	1007	1425	1277	1243	3.10854	2.94434	3.47236	3.16904	3.55206	3.62505	3.75746	3.659	3.38547	3.41889	3.65273	3.15791	3.51617	3.56849	3.63317	3.72493
StDof23	PGSC0003DMG400033046	7277	4641	2286	881	6542	2011	536	4992	5767	1521	912	6537	3851	2001	391	3493	6.21145	5.44684	4.28445	3.16413	5.91243	4.38808	2.12311	5.54887	5.65749	3.84377	3.01802	6.0791	5.45134	4.05825	1.92565	5.21557
StDof5	PGSC0003DMG400037029	13	34	134	41	831	541	412	299	43	523	70	29	833	949	720	437	-2.91723	-1.64592	0.191932	-1.26131	2.93562	2.49386	1.74352	1.48746	-1.40985	2.30363	-0.685588	-1.73733	3.24249	2.982	2.80648	2.21681
avg = avarge of three biological replicates
SLC = susceptible leaf control
SL1 = early susceptible leaf
SL2 = late susceptible leaf
SL3 = recovery susceptible leaf
SR1 = early susceptible root
SR2 = late susceptible root
SR3 = recovery susceptible root
SLC = susceptible root control
TL1 = early tolerant leaf
TL2 = late tolerant leaf
TL3 = recovery tolerant leaf
TLC = tolerant leaf control
TR1 = early tolerant root
TR2 = late tolerant root
TR3 = recovery tolerant root
TRC = tolerant root control

## Sheet: Woolfson et al., 2023
		0 h post wounding	12 h post wounding	24 h post wounding	48 h post wounding	72 h post wounding	0 h post wounding	12 h post wounding	24 h post wounding	48 h post wounding	72 h post wounding
		avg SRR21350433 SRR21350432 SRR21350426	avg SRR21350425 SRR21350424 SRR21350423	avg SRR21350422 SRR21350421 SRR21350420	avg SRR21350419 SRR21350431 SRR21350430	avg SRR21350429 SRR21350428 SRR21350427	avg SRR21350433 SRR21350432 SRR21350426	avg SRR21350425 SRR21350424 SRR21350423	avg SRR21350422 SRR21350421 SRR21350420	avg SRR21350419 SRR21350431 SRR21350430	avg SRR21350429 SRR21350428 SRR21350427
DOF name	Gene ID	Counts Per Million (CPM)					log2 CPM
StDOF11	PGSC0003DMG400001330	3494	8577	3065	7587	11219	4.58514	5.74208	4.3684	5.57552	6.12988
StDOF19	PGSC0003DMG400018408	797	128	181	452	546	2.45291	-0.324181	0.28657	1.50638	1.76898
StDof15	PGSC0003DMG400019528	835	953	1044	2296	3238	2.52011	2.57215	2.81463	3.85111	4.33711
StDOF4	PGSC0003DMG400025129	19663	7026	5432	6531	7573	7.07767	5.45431	5.19399	5.35929	5.56287
StDof23	PGSC0003DMG400033046	748	386	1195	2615	3427	2.36137	1.26828	3.00952	4.0388	4.41895
StDof5	PGSC0003DMG400037029	316	361	230	542	257	1.11826	1.17167	0.632215	1.76835	0.681848
avg = avarge of three biological replicates
