# Supplementary material for: Exploring CDF gene family in wild potato under salinity stress unveils promising candidates for developing climate-resilient crops
Source: Springer Nature journal article supplement (doi:10.1038/s41598-024-75412-2), 2024-10-19
Supplement: MOESM2 [file 41598_2024_75412_MOESM2_ESM.docx]

SUPPLEMENTARY TABLES, FIGURES AND FILES FOR:

**Exploring *CDF* gene family in wild potato under abiotic stress unveils promising candidates for developing climate-resilient crops**

Teresa Docimo1*, Anna Paesano2§, Nunzio D’Agostino2*, Vincenzo D’Amelia1, Raffaele Garramone2, Domenico Carputo2 and Riccardo Aversano2

Affiliations

1National Research Council of Italy, Institute of Biosciences and Bioresources (CNR-IBBR), Via Università 133, Portici, NA Italy

2Department of Agricultural Sciences, University of Naples Federico II, piazza Carlo di Borbone 1, 80055, Portici, Italy

§Present address: Department of Agricultural and Food Sciences, Alma Mater Studiorum - University of Bologna, Viale Fanin 40, Bologna Italy

**Supplementary Figure**


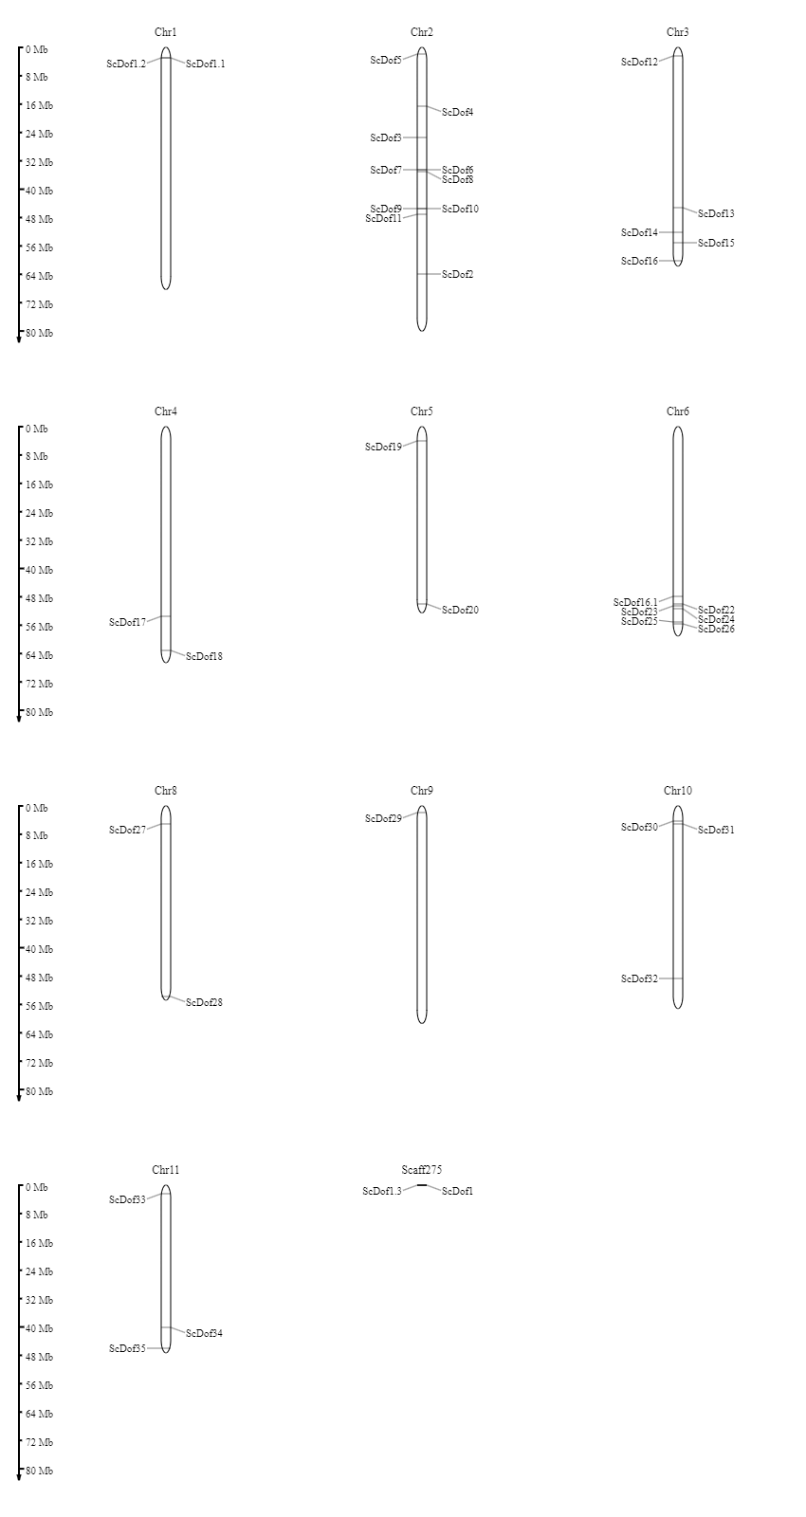


**Supplementary Figure 1.** **Chromosomal locations of *ScDof*.**

**Supplementary Tables**

**Supplementary Table 1. List of genes used to construct the cladogram tree.**

| **Dof ID** | **Gene ID** | **Protein ID** | **protein size (aa)** |
| --- | --- | --- | --- |
| ***Solanum commersonii*** | | | |
| ScDof1 | H5410_064943 | KAG5568040.1 | 310 |
| ScDof1.1 | H5410_000378 | KAG5628661.1 | 293 |
| ScDof1.2 | H5410_000377 | KAG5628660.1 | 317 |
| ScDof1.3 | H5410_064942 | KAG5568039.1 | 308 |
| ScDof2 | H5410_011756 | KAG5626538.1 | 272 |
| ScDof3 | H5410_006649 | KAG5621431.1 | 195 |
| ScDof4 | H5410_006793 | KAG5621575.1 | 458 |
| ScDof5 | H5410_004701 | KAG5619483.1 | 164 |
| ScDof6 | H5410_007767 | KAG5622549.1 | 397 |
| ScDof7 | H5410_007768 | KAG5622550.1 | 308 |
| ScDof8 | H5410_007846 | KAG5622628.1 | 283 |
| ScDof9 | H5410_009235 | KAG5624017.1 | 281 |
| ScDof10 | H5410_009241 | KAG5624023.1 | 240 |
| ScDof11 | H5410_009463 | KAG5624245.1 | 489 |
| ScDof12 | H5410_013780 | KAG5613956.1 | 256 |
| ScDof13 | H5410_017125 | KAG5617301.1 | 261 |
| ScDof14 | H5410_017997 | KAG5618173.1 | 331 |
| ScDof15 | H5410_018373 | KAG5618549.1 | 503 |
| ScDof16 | H5410_019076 | KAG5619252.1 | 198 |
| ScDof16.1 | H5410_033329 | KAG5601959.1 | 353 |
| ScDof17 | H5410_023495 | KAG5612214.1 | 265 |
| ScDof18 | H5410_024467 | KAG5613186.1 | 236 |
| ScDof19 | H5410_025527 | KAG5604035.1 | 441 |
| ScDof20 | H5410_029196 | KAG5607704.1 | 302 |
| ScDof22 | H5410_033604 | KAG5602234.1 | 357 |
| ScDof23 | H5410_033668 | KAG5602298.1 | 492 |
| ScDof24 | H5410_033771 | KAG5602401.1 | 280 |
| ScDof25 | H5410_034258 | KAG5602888.1 | 302 |
| ScDof26 | H5410_034350 | KAG5602980.1 | 326 |
| ScDof27 | H5410_039993 | KAG5589479.1 | 220 |
| ScDof28 | H5410_043978 | KAG5593464.1 | 330 |
| ScDof29 | H5410_044339 | KAG5583905.1 | 396 |
| ScDof30 | H5410_049908 | KAG5579281.1 | 188 |
| ScDof31 | H5410_049975 | KAG5579348.1 | 256 |
| ScDof32 | H5410_053120 | KAG5582493.1 | 367 |
| ScDof33 | H5410_054653 | KAG5574519.1 | 372 |
| ScDof34 | H5410_057921 | KAG5577787.1 | 310 |
| ScDof35 | H5410_058673 | KAG5578539.1 | 306 |
| ***Solanum tuberosum*** | |  |  |
| StDof1 | PGSC0003DMG400021361 | PGSC0003DMP400037029 | 313 |
| StDof2 | PGSC0003DMG400000120 | PGSC0003DMP400000266 | 265 |
| StDof3 | PGSC0003DMG400013105 | PGSC0003DMP400023207 | 194 |
| StDof4 | PGSC0003DMG400025129 | PGSC0003DMP400043612 | 465 |
| StDof5 | PGSC0003DMG400037029 | PGSC0003DMP400059133 | 165 |
| StDof6a | PGSC0003DMG400029729 | PGSC0003DMP400051791 | 398 |
| StDof6b | PGSC0003DMG400029729 | PGSC0003DMP400051790 | 367 |
| StDof7a | PGSC0003DMG400029708 | PGSC0003DMP400051750 | 285 |
| StDof7b | PGSC0003DMG400029708 | PGSC0003DMP400051749 | 190 |
| StDof8 | PGSC0003DMG400022431 | PGSC0003DMP400038896 | 282 |
| StDof9 | PGSC0003DMG400010027 | PGSC0003DMP400017726 | 280 |
| StDof10 | PGSC0003DMG400010075 | PGSC0003DMP400017852 | 240 |
| StDof11a | PGSC0003DMG400001330 | PGSC0003DMP400002386 | 487 |
| StDof11b | PGSC0003DMG400001330 | PGSC0003DMP400002387 | 469 |
| StDof12 | PGSC0003DMG400012825 | PGSC0003DMP400022708 | 258 |
| StDof13 | PGSC0003DMG400018541 | PGSC0003DMP400032312 | 261 |
| StDof14 | PGSC0003DMG400018090 | PGSC0003DMP400031524 | 330 |
| StDof15a | PGSC0003DMG400019528 | PGSC0003DMP400033936 | 503 |
| StDof15b | PGSC0003DMG400019528 | PGSC0003DMP400033935 | 396 |
| StDof16 | PGSC0003DMG400002507 | PGSC0003DMP400004435 | 208 |
| StDof17 | PGSC0003DMG400000786 | PGSC0003DMP400001503 | 266 |
| StDof18 | PGSC0003DMG400011680 | PGSC0003DMP400020702 | 196 |
| StDof19a | PGSC0003DMG400018408 | PGSC0003DMP400032069 | 442 |
| StDof19b | PGSC0003DMG400018408 | PGSC0003DMP400032070 | 360 |
| StDof20 | PGSC0003DMG400023426 | PGSC0003DMP400040516 | 302 |
| StDof21 | PGSC0003DMG400029191 | PGSC0003DMP400050832 | 278 |
| StDof22 | PGSC0003DMG400004062 | PGSC0003DMP400007249 | 319 |
| StDof23 | PGSC0003DMG400033046 | PGSC0003DMP400055798 | 492 |
| StDof24 | PGSC0003DMG400027089 | PGSC0003DMP400047058 | 280 |
| StDof25a | PGSC0003DMG400007506 | PGSC0003DMP400013293 | 302 |
| StDof25b | PGSC0003DMG400007506 | PGSC0003DMP400013292 | 281 |
| StDof26 | PGSC0003DMG400030406 | PGSC0003DMP400052918 | 320 |
| StDof27 | PGSC0003DMG400005798 | PGSC0003DMP400010277 | 242 |
| StDof28 | PGSC0003DMG400012249 | PGSC0003DMP400021675 | 332 |
| StDof29a | PGSC0003DMG400008914 | PGSC0003DMP400015688 | 403 |
| StDof29b | PGSC0003DMG400008914 | PGSC0003DMP400015687 | 292 |
| StDof30 | PGSC0003DMG400022814 | PGSC0003DMP400039559 | 197 |
| StDof31 | PGSC0003DMG400018886 | PGSC0003DMP400032907 | 271 |
| StDof32 | PGSC0003DMG400019155 | PGSC0003DMP400033281 | 374 |
| StDof33 | PGSC0003DMG400016116 | PGSC0003DMP400028150 | 379 |
| StDof34 | PGSC0003DMG400000441 | PGSC0003DMP400000873 | 256 |
| StDof35a | PGSC0003DMG400025372 | PGSC0003DMP400044011 | 299 |
| StDof35b | PGSC0003DMG400025372 | PGSC0003DMP400044012 | 292 |
| ***Solanum lycopersiucm*** | | | |
| SlDof1 | Solyc01g096120 | Solyc01g096120 | 276 |
| SlDof2 | Solyc02g065290 | Solyc02g065290 | 203 |
| SlDof3 | Solyc02g067230 | Solyc02g067230 | 467 |
| SlDof4 | Solyc02g076850 | Solyc02g076850 | 163 |
| SlDof5 | Solyc02g077950 | Solyc02g077950 | 379 |
| SlDof6 | Solyc02g077960 | Solyc02g077960 | 299 |
| SlDof7 | Solyc02g078620 | Solyc02g078620 | 284 |
| SlDof8 | Solyc02g088070 | Solyc02g088070 | 462 |
| SlDof9 | Solyc02g090220 | Solyc02g090220 | 234 |
| SlDof10 | Solyc02g090310 | Solyc02g090310 | 260 |
| SlDof11 | Solyc03g082840 | Solyc03g082840 | 258 |
| SlDof12 | Solyc03g112930 | Solyc03g112930 | 333 |
| SlDof13 | Solyc03g115940 | Solyc03g115940 | 501 |
| SlDof14 | Solyc03g121400 | Solyc03g121400 | 210 |
| SlDof15 | Solyc04g070960 | Solyc04g070960 | 267 |
| SlDof16 | Solyc04g079570 | Solyc04g079570 | 239 |
| SlDof17 | Solyc05g007880 | Solyc05g007880 | 441 |
| SlDof18 | Solyc05g054510 | Solyc05g054510 | 298 |
| SlDof19 | Solyc06g005130 | Solyc06g005130 | 306 |
| SlDof20 | Solyc06g062520 | Solyc06g062520 | 192 |
| SlDof22 | Solyc06g069760 | Solyc06g069760 | 492 |
| SlDof23 | Solyc06g071480 | Solyc06g071480 | 268 |
| SlDof24 | Solyc06g075370 | Solyc06g075370 | 303 |
| SlDof25 | Solyc06g076030 | Solyc06g076030 | 334 |
| SlDof26 | Solyc08g008500 | Solyc08g008500 | 227 |
| SlDof27 | Solyc08g082910 | Solyc08g082910 | 318 |
| SlDof28 | Solyc09g010680 | Solyc09g010680 | 330 |
| SlDof29 | Solyc10g009360 | Solyc10g009360 | 261 |
| SlDof30 | Solyc10g086440 | Solyc10g086440 | 362 |
| SlDof31 | Solyc11g010940 | Solyc11g010940 | 374 |
| SlDof32 | Solyc11g066050 | Solyc11g066050 | 264 |
| SlDof33 | Solyc11g072500 | Solyc11g072500 | 282 |
| SlDof34 | Solyc00g024680 | Solyc00g024680 | 173 |
| ***Arabidopsis thaliana*** | | | |
| AtDof1.1 | At1g07640 | At1g07640 | 339 |
| AtDof1.2 | At1g21340 | At1g21340 | 260 |
| AtDof1.3 | At1g26790 | At1g26790 | 372 |
| AtDof1.4 | At1g28310 | At1g28310 | 335 |
| AtDof1.5 | At1g29160 | At1g29160 | 175 |
| AtDof1.6 | At1g47655 | At1g47655 | 209 |
| AtDof1.7 | At1g51700 | At1g51700 | 194 |
| AtDof1.8 | At1g64620 | At1g64620 | 352 |
| AtDof1.10 | At1g69570 | At1g69570 | 399 |
| AtDof2.1 | At2g28510 | At2g28510 | 288 |
| AtDof2.2 | At2g28810 | At2g28810 | 340 |
| AtDof2.3 | At2g34140 | At2g34140 | 170 |
| AtDof2.4 | At2g37590 | At2g37590 | 330 |
| AtDof2.5 | At2g46590 | At2g46590 | 369 |
| AtDof3.1 | At3g21270 | At3g21270 | 204 |
| AtDof3.2 | At3g45610 | At3g45610 | 245 |
| AtDof3.3 | At3g47500 | At3g47500 | 448 |
| AtDof3.4 | At3g50410 | At3g50410 | 253 |
| AtDof3.5 | At3g52440 | At3g52440 | 266 |
| AtDof3.6 | At3g55370 | At3g55370 | 368 |
| AtDof3.7 | At3g61850 | At3g61850 | 324 |
| AtDof4.1 | At4g00940 | At4g00940 | 294 |
| AtDof4.2 | At4g21030 | At4g21030 | 194 |
| AtDof4.3 | At4g21040 | At4g21040 | 232 |
| AtDof4.4 | At4g21050 | At4g21050 | 210 |
| AtDof4.5 | At4g21080 | At4g21080 | 249 |
| AtDof4.6 | At4g24060 | At4g24060 | 342 |
| AtDof4.7 | At4g38000 | At4g38000 | 246 |
| AtDof5.1 | At5g02460 | At5g02460 | 399 |
| AtDof5.2 | At5g39660 | At5g39660 | 457 |
| AtDof5.3 | At5g60200 | At5g60200 | 257 |
| AtDof5.4 | At5g60850 | At5g60850 | 307 |
| AtDof5.5 | At5g62430 | At5g62430 | 298 |
| AtDof5.6 | At5g62940 | At5g62940 | 372 |
| AtDof5.7 | At5g65590 | At5g65590 | 316 |
| AtDof5.8 | At5g66940 | At5g66940 | 225 |

**Supplementary Table 2. List of scientific articles from which Sequence Read Archive data (first column) was extracted.**

|  | | |
| --- | --- | --- |
| **Sequence Read Archive (run IDs)** | **Reference** | **Digital Object Identifier** |
| SRR2932299-SRR2932330 | Kwenda et al.. 2016 | 10.3389/fpls.2016.01905 |
| SRR10723824-SRR10723850 | Li et al.. 2020 | 10.1038/s41598-020-62057-0 |
| SRR8846453-SRR8846458 | Tiwari et al.. 2020 | 10.1038/s41598-020-58167-4 |
| SRR22159760-SRR22159779 | Alvarez-Morezuelas et al.. 2022 | 10.3390/ijms232213905 |
| SRR14902814-SRR14902849 | Guo et al.. 2022 | 10.1186/s12870-022-03652-3 |
| SRR18272797-SRR18272817 | Jian et al.. 2022 | 10.1186/s12870-022-03758-8 |
| SRR21209895-SRR21209942 | Ponce et al.. 2022 | 10.3389/fpls.2022.1003907 |
| SRR21350419-SRR21350433 | Woolfson et al.. 2023 | 10.1016/j.phytochem.2022.113529 |

**Supplementary Table 3 List of primers used in this study.**

| **Genes** | **Accession number** | **Primer sequence (5’-3’)** | **Amplicon size (bp)** | **Tm (°C)**  **Melting** |
| --- | --- | --- | --- | --- |
| *StDOF15b* | PGSC0003DMG400019528 | F: TCCAGCGTTCAAACCCAATG | 111 | 60.3 |
| R: CCCATTTGGTGTATTATTCTCGG | 58.9 |
| *StDOF5* | PGSC0003DMG400037029 | F: GCAAAAGCATGGAAACCAAATT | 96 | 55.9 |
| R: GCCGTCCAGTATCTCTGACAACC | 64.2 |
| *StDOF19a* | PGSC0003DMG400018408 | F: GATCTGGTCGCCGAAAGAAC | 119 | 61.8 |
| R: ACAGTTCCATTTGTCCTTAAAGC | 57.1 |
| *StDOF23* | PGSC0003DMG400033046 | F: GGTCTAACATCCCAACTCCAA | 108 | 61 |
| R: GGAGGCAAGGAACAGGAGAT | 59.4 |
| *StDOF4* | PGSC0003DMG400025129 | F: CAGTTGGTGGAAGTCCTTTCAGT | 114 | 60.7 |
| R: TTACTGACCGAGACAACGCT | 59.8 |
| *StDOF11b* | PGSC0003DMG400001330 | F: GCTCCTGATTCTCCAACTTCG | 119 | 59.8 |
| R: TTAGGAAACCACAGACGCCTCC | 62.1 |
| *EF* | XM_006343390 | F: ATTGGAAACGGATATGCTCCA | 101 | 55 |
| R: TCCTTACCTGAACGCCTGTCA | 55 |

**Supplementary Table 4. List of traits measured with their abbreviations SD= standard deviation; SE= standard error.**

|  |  | # leaves per plant | Roots # roots per plant | Shoot fresh weight | Shoot dry weight | Root fresh weight | Root dry weight | Days of shoot emission | Days of root emission | Total rresh weight | Total dry weight | Shoot length | Root length |
| --- | --- | --- | --- | --- | --- | --- | --- | --- | --- | --- | --- | --- | --- |
| Species | Treatment  NaCl[mM] | LN | RN | SFW | SDW | RFW | RDW | DS | DR | TFW | TDW | SH | RL |
| DM | 0 | 28.00 | 11.00 | 307.00 | 29.00 | 80.00 | 8.00 | 26.00 | 23.00 | 387.00 | 37.00 | 90.00 | 63.00 |
| 18.00 | 3.00 | 108.00 | 11.00 | 26.00 | 3.00 | 26.00 | 23.00 | 134.00 | 14.00 | 86.00 | 47.00 |
| 34.00 | 10.00 | 128.00 | 14.00 | 38.00 | 5.00 | 26.00 | 23.00 | 166.00 | 19.00 | 42.00 | 67.00 |
| 13.00 | 2.00 | 43.00 | 5.00 | 6.00 | 1.00 | 26.00 | 13.00 | 49.00 | 6.00 | 62.00 | 45.00 |
| 17.00 | 9.00 | 150.00 | 18.00 | 47.00 | 5.00 | 26.00 | 13.00 | 197.00 | 23.00 | 85.00 | 73.00 |
| 13.00 | 3.00 | 76.00 | 6.00 | 18.00 | 2.00 | 25.00 | 23.00 | 94.00 | 8.00 | 55.00 | 50.00 |
| 14.00 | 2.00 | 30.00 | 3.00 | 6.00 | 1.00 | 25.00 | 23.00 | 36.00 | 4.00 | 35.00 | 50.00 |
| 35.00 | 2.00 | 150.00 | 12.00 | 21.00 | 2.00 | 25.00 | 23.00 | 171.00 | 14.00 | 58.00 | 77.00 |
| 20.00 | 3.00 | 178.00 | 15.00 | 30.00 | 3.00 | 25.00 | 23.00 | 208.00 | 18.00 | 90.00 | 77.00 |
|  |  |  |  |  |  |  |  |  |  |  |  |  |  |
| mean |  | 21.33 | 5.00 | 130.00 | 12.56 | 30.22 | 3.33 | 25.56 | 20.78 | 160.22 | 15.89 | 67.00 | 61.00 |
| SD |  | 8.77 | 3.81 | 83.22 | 7.92 | 23.04 | 2.29 | 0.53 | 4.41 | 104.93 | 10.12 | 21.34 | 13.18 |
| SE |  | 2.92 | 1.27 | 27.74 | 2.64 | 7.68 | 0.76 | 0.18 | 1.47 | 34.98 | 3.37 | 7.11 | 4.39 |
|  |  |  |  |  |  |  |  |  |  |  |  |  |  |
| DM | 80 | 2.00 | 0.00 | 21.00 | 2.50 | 0.00 | 0.00 | 25.00 | 15.00 | 21.00 | 2.50 | 5.00 | 0.00 |
| 3.50 | 0.00 | 27.00 | 5.00 | 0.00 | 0.00 | 25.00 | 15.00 | 27.00 | 5.00 | 6.50 | 0.00 |
| 4.50 | 0.00 | 36.50 | 5.00 | 0.00 | 0.00 | 25.00 | 15.00 | 36.50 | 5.00 | 7.00 | 0.00 |
| 5.00 | 0.00 | 40.50 | 5.00 | 0.00 | 0.00 | 25.00 | 15.00 | 40.50 | 5.00 | 8.00 | 0.00 |
| 7.00 | 1.00 | 45.50 | 6.00 | 0.00 | 0.00 | 25.00 | 25.50 | 45.50 | 6.00 | 8.50 | 5.00 |
| 8.50 | 1.00 | 76.00 | 7.00 | 3.50 | 1.50 | 25.50 | 26.50 | 56.50 | 6.50 | 8.50 | 25.00 |
| 9.00 | 1.00 | 83.50 | 7.50 | 23.00 | 2.50 | 25.50 | 26.50 | 114.00 | 10.00 | 14.00 | 30.00 |
| 10.00 | 1.00 | 102.50 | 10.00 | 30.50 | 2.50 | 25.50 | 26.50 | 125.50 | 12.50 | 15.50 | 34.00 |
| 15.00 | 1.50 | 116.50 | 11.00 | 33.50 | 2.50 | 25.50 | 28.50 | 150.00 | 13.50 | 27.50 | 35.00 |
|  |  |  |  |  |  |  |  |  |  |  |  |  |  |
| mean |  | 7.17 | 0.61 | 61.00 | 6.56 | 10.06 | 1.00 | 25.22 | 21.50 | 68.50 | 7.33 | 11.17 | 14.33 |
| SD |  | 3.98 | 0.60 | 34.55 | 2.66 | 14.51 | 1.22 | 0.26 | 6.21 | 47.99 | 3.77 | 7.03 | 16.13 |
| SE |  | 1.33 | 0.20 | 11.52 | 0.89 | 4.84 | 0.41 | 0.09 | 2.07 | 16.00 | 1.26 | 2.34 | 5.38 |
|  |  |  |  |  |  |  |  |  |  |  |  |  |  |
| CMM1T | 0 | 11.00 | 4.00 | 35.00 | 6.90 | 62.50 | 3.30 | 27.00 | 23.00 | 97.50 | 10.20 | 11.00 | 110.00 |
| 11.00 | 10.00 | 53.00 | 8.70 | 23.60 | 2.70 | 27.00 | 24.00 | 76.60 | 11.40 | 13.00 | 100.00 |
| 14.00 | 9.00 | 87.40 | 10.40 | 48.70 | 4.50 | 27.00 | 24.00 | 136.10 | 14.90 | 20.00 | 126.00 |
| 8.00 | 6.00 | 41.50 | 5.30 | 22.60 | 2.10 | 27.00 | 23.00 | 64.10 | 7.40 | 10.00 | 89.00 |
| 14.00 | 2.00 | 45.20 | 4.90 | 14.50 | 0.90 | 26.00 | 24.00 | 59.70 | 5.80 | 9.00 | 156.00 |
| 14.00 | 11.00 | 117.50 | 12.30 | 38.60 | 3.80 | 27.00 | 24.00 | 156.10 | 16.10 | 22.00 | 125.00 |
| 11.00 | 4.00 | 36.60 | 4.50 | 17.20 | 1.80 | 27.00 | 23.00 | 53.80 | 6.30 | 10.00 | 113.00 |
| 12.00 | 4.00 | 38.20 | 5.30 | 15.00 | 4.80 | 27.00 | 23.00 | 53.20 | 10.10 | 12.00 | 120.00 |
| 11.00 | 6.00 | 53.10 | 5.80 | 23.10 | 3.20 | 26.00 | 23.00 | 76.20 | 9.00 | 9.00 | 126.00 |
|  |  |  |  |  |  |  |  |  |  |  |  |  |  |
| mean |  | 11.78 | 6.22 | 56.39 | 7.12 | 29.53 | 3.01 | 26.78 | 23.44 | 85.92 | 10.13 | 12.89 | 118.33 |
| SD |  | 1.99 | 3.11 | 27.94 | 2.75 | 16.77 | 1.28 | 0.44 | 0.53 | 37.12 | 3.57 | 4.81 | 18.97 |
| SE |  | 0.66 | 1.04 | 9.31 | 0.92 | 5.59 | 0.43 | 0.15 | 0.18 | 12.37 | 1.19 | 1.60 | 6.32 |
|  |  |  |  |  |  |  |  |  |  |  |  |  |  |
| CMM1T | 80 | 10.50 | 5.00 | 66.45 | 8.20 | 24.35 | 2.25 | 26.00 | 24.75 | 90.80 | 10.45 | 14.25 | 65.50 |
| 8.25 | 3.50 | 58.75 | 6.15 | 13.05 | 1.80 | 26.25 | 24.75 | 60.30 | 6.95 | 9.25 | 57.00 |
| 11.50 | 1.50 | 64.35 | 6.20 | 18.75 | 1.70 | 25.75 | 25.25 | 86.85 | 7.90 | 11.50 | 93.00 |
| 12.00 | 6.00 | 110.00 | 11.15 | 34.55 | 3.15 | 26.25 | 25.25 | 140.80 | 14.30 | 18.75 | 79.50 |
| 13.00 | 2.75 | 76.55 | 7.75 | 25.35 | 2.15 | 26.25 | 25.75 | 101.90 | 9.90 | 18.75 | 74.00 |
| 6.00 | 2.00 | 19.10 | 2.65 | 7.50 | 2.40 | 13.50 | 11.50 | 26.60 | 5.05 | 6.00 | 60.00 |
| 9.08 | 3.31 | 57.05 | 6.18 | 16.58 | 2.10 | 25.61 | 22.25 | 72.35 | 8.17 | 10.08 | 70.17 |
| 1.99 | 0.30 | 17.28 | 1.33 | 7.25 | 0.61 | 0.13 | 3.11 | 23.99 | 1.89 | 3.51 | 8.07 |
| 6.55 | 3.21 | 33.95 | 4.00 | 17.18 | 1.71 | 13.43 | 12.76 | 50.96 | 5.70 | 7.62 | 61.86 |
|  |  |  |  |  |  |  |  |  |  |  |  |  |  |
| mean |  | 8.76 | 3.06 | 55.94 | 5.96 | 18.29 | 1.99 | 20.35 | 19.49 | 72.73 | 7.81 | 11.08 | 63.23 |
| SD |  | 3.50 | 1.73 | 29.31 | 2.99 | 8.81 | 0.68 | 9.33 | 8.26 | 37.32 | 3.56 | 5.33 | 23.49 |
| SE |  | 1.17 | 0.58 | 9.77 | 1.00 | 2.94 | 0.23 | 3.11 | 2.75 | 12.44 | 1.19 | 1.78 | 7.83 |

**Supplementary Table 5. Statistical evaluation of phenotypic traits.**

|  | Parameter | Species | *p*value | Significance |  |
| --- | --- | --- | --- | --- | --- |
| Number of leaves per plant | LN | DM | 2.90E-03 | ** |  |
| CMM1T | 6.03E-02 |  |  |
| Number of roots per plant | RN | DM | 1.20E-02 | * |  |
| CMM1T | 3.59E-02 | * |  |
| Shoot fresh weight | SFW | DM | 6.31E-02 |  |  |
| CMM1T | 9.78E-01 |  |  |
| Sh.oot dry weight | SDW | DM | 8.68E-02 |  |  |
|  | CMM1T | 4.71E-01 |  |  |
| Root fresh weight | RFW | DM | 8.71E-02 |  |  |
| CMM1T | 1.01E-01 |  |  |
| Root dry weight | RDW | DM | 5.53E-02 |  |  |
| CMM1T | 1.19E-01 |  |  |
| Days of shoot emission | DS | DM | 2.42E-01 |  |  |
| CMM1T | 7.27E-02 |  |  |
| Days of root emission | DR | DM | 7.71E-01 |  |  |
| CMM1T | 1.82E-01 |  |  |
| Total fresh weight | TFW | DM | 5.68E-02 |  |  |
| CMM1T | 5.18E-01 |  |  |
| Total dry weight | TDW | DM | 6.56E-02 |  |  |
| CMM1T | 2.80E-01 |  |  |
| Shoot length | SH | DM | 5.81E-05 | *** |  |
| CMM1T | 5.38E-01 |  |  |
| Root length | RL | DM | 3.78E-05 | *** |  |
| CMM1T | 5.44E-04 | *** |  |
|  |  |  |  |  |  |

Bold asterisks indicate the significant differences between clones determined by the Student's t-test (* p < 0.05, ** p < 0.01, *** p<0.001).

Supplementary File 1. Expression values of genes PGSC0003DMG400025129, PGSC0003DMG400037029, PGSC0003DMG400001330, PGSC0003DMG400019528, PGSC0003DMG400018408, PGSC0003DMG400033046 rendered in CPM (Counts Per Million) and log2 CPM.
